# Supplementary material for: Unconventional Enhancement of Spin-Orbit Torque with Laterally Extended Heavy Metal Layer
Source: Research Square preprint supplement (doi:10.21203/rs.3.rs-8536588/v1), 2026-01-13
Supplement: Supplementary file 1 [file c978ad5c292080e2b6362c5d.docx]

***Supplementary Notes***

**Unconventional Enhancement of Spin-Orbit Torque with Laterally Extended Heavy Metal Layer**

**Dongryul Kim1, Soobeom Lee2,, Jaeyong Cho1, and Chun-Yeol You1,** †

1Department of Physics and Chemistry, Daegu Gyeongbuk Institute of Science and Technology, Daegu, 42988, Republic of Korea

2Department of Electrical and Computer Engineering, Shinshu University, Nagano, 380-8553, Japan

†Correspondence to: [cyyou@dgist.ac.kr](mailto:cyyou@dgist.ac.kr)

**S1: Fabrication details of samples of *w*HM > *w*FM**

**S2: Verification of the etching process using Anomalous Hall Effect measurements**

**S3: Determine the current density of HM layer using the parallel resistances model**

**S4: SOT efficiency for asymmetric ferromagnet wire position**

**S5: Image processing to define the precise domain wall position**

**S6: DW pinning field for various *w*FM**

**S7: Validation of Consistent Magnetic Properties**

**Supplementary Note 1. Fabrication details of samples of *w*HM > *w*FM**

Two primary methods were considered for fabricating the unconventional wire structure with an extended heavy metal (HM) layer (*w*HM​> *w*FM ​). The first approach involves fabricating and patterning the HM and FM layers in separate, sequential steps. This method, however, inevitably exposes the HM surface to atmosphere and harsh photolithography chemicals, which can degrade and hard to reproduce the critical interface-sensitive magnetic properties such as the Dzyaloshinskii–Moriya interaction (DMI) and perpendicular magnetic anisotropy (PMA).

Consequently, we adopted a second approach: defining the final FM pattern on top of a fully deposited stack and then selectively etching the surrounding material. This method preserves the pristine HM/FM interface. A key challenge in this approach is the precise control of the etching process to ensure complete removal of the unwanted top FM layers without damaging the underlying HM layer.

Our optimized process, illustrated in Fig. S1a–e, is executed as follows: (I) Initial Patterning: First, the entire Ta/Pt/Co/Ta/MgO/Pt heterostructure is deposited. The full stack is then patterned and etched to define the desired Hall bar shape of the width of *w*HM. (II) FM Mask Definition: A second photolithography step is performed to create a photoresist (PR) mask that corresponds to the final, narrower *w*FM wire pattern on top of the previously defined full stack wire. (III) Etch Calibration: To precisely monitor the etch depth, a reference sample is prepared by depositing the top FM layers (Co/Ta/MgO/Pt) only onto a transparent glass substrate. This reference sample is co-loaded with the primary devices into the ion beam milling system and etched simultaneously. (IV) Controlled Etching: The ion milling process is terminated immediately once the reference sample becomes visually transparent. Even though we employing the eye-inspection technique, however, we confirmed that it provides a reliable, real-time indicator that the opaque metallic FM layers have been completely removed from the unprotected areas of the primary sample. (V) Final Structure: Finally, the remaining photoresist is stripped from the FM wire. This step yields the desired final device: a narrow FM wire placed on a wider, exposed HM wire, as depicted in Fig. S1e.

**Supplementary Note 2: Verification of the etching process using Anomalous Hall Effect measurements**

It is crucial to verify the complete removal of the unwanted ferromagnetic (FM) layer following the fabrication process detailed in Supplementary Note 1. While our etch-stop method, which relies on visually monitoring a reference sample until it becomes transparent, is an effective primary indicator, a more quantitative confirmation is necessary. Therefore, we employed Anomalous Hall Effect (AHE) measurements as a direct probe to confirm the etching quality on the final devices. By measuring the AHE signal, we can definitively identify any residual magnetic material. The distinct outcomes are illustrated in Fig. S2: (a) Complete Etch: A successfully etched device, where the unwanted FM layer is fully removed, exhibits a single, sharp, square AHE hysteresis loop (Fig. S2a). This ideal signal originates exclusively from the intended narrow FM wire, which possesses strong perpendicular magnetic anisotropy (PMA). (b) Incomplete etch with retained PMA: If unetched FM remnants with intact PMA are present in the etched area, the AHE measurement will show a two-step switching behavior in the hysteresis loop (Fig. S2b). This composite signal is a superposition of the switching fields of the main FM wire and the residual patches. (c) Incomplete etch with lost PMA: If the etching process damages the FM remnants, causing them to lose their PMA, the AHE loop appears unsaturated and sloped (Fig. S2c). This shape results from the combination of the square loop from the PMA wire and a linear, in-plane magnetic response from the damaged remnants. Thus, AHE measurements serve as a reliable and definitive test to validate the completeness of the etching process for each fabricated device.

**Supplementary Note 3. Determine the current density of HM layer using the parallel resistances model**

| *R*total -1​ = *R*FM -1 ​+ *R*HM ​-1 | (S1) |
| --- | --- |

To accurately determine the current density in our samples, the total device resistance was measured using a standard four-terminal configuration, as depicted in Fig. S3a. Figure S3b plots the total measured resistance for the ES series devices (*R*total​) as a function of the ferromagnetic (FM) layer width (*w*FM​). The data is analyzed using a parallel resistor model, where the heavy metal (HM) and FM layers are treated as two conductors in parallel. The total resistance is therefore given by:

|  | (S2) |
| --- | --- |

here *R*FM​ and *R*HM​ are the resistances of the individual layers. These are defined by the layer resistivity (*ρ*), the voltage channel length (*l*), the wire width (*w*), and the thickness (*t*) as follows:

The solid line in Fig. S3b represents a fit of the experimental data to Eq. (S1), treating *w*FM​ as the independent variable. From this fit, we extracted the resistivities of the FM and HM layers to be *ρ*FM​=0.48 µΩ m and *ρ*HM​=0.71 µΩ m, respectively. With the resistivities established, the current density (*J*) in each layer can be calculated for a given applied voltage, *V*applied​, measured across the channel length *l*. Since the electric field (*E*=*V*applied​/*l*) is uniform

|  | (S3) |
| --- | --- |

across the parallel layers, the current density in each layer is given by Ohm's law:

**Supplementary Note S4. SOT efficiency for asymmetric ferromagnet wire position**

Our main results (Fig. 7) show that SOT efficiency improves as the width ratio *w*FM/*w*HM decreases. To vindicate our result is not influenced by artifacts from localized edge effect, we fabricated a series in which the FM layer was located asymmetrically with the HM layer. As shown in Fig. S4a and b, the wire widths were held constant at *w*FM ​=3 µm and *w*HM ​= 20 µm; the FM wire was placed either at the center of the HM wire or asymmetrically displaced from the center by 2 µm, 5 µm, and 8.5 µm, respectively.

Following the same harmonic Hall measurement methodology used in the main text, we determined the DL-SOT efficiency for each configuration. The results, plotted in Supplementary Fig. S4c, show that the DL-SOT efficiency is nearly identical for all four FM wire positions. This finding strongly indicates that the observed SOT enhancement is not affected by any localized effect that may arise from the vicinity of the HM edge.

**Supplementary Note 5. Image processing to define the precise domain wall position**

This section details the computational method used to precisely measure SOT-driven DW velocity from a time-series of Kerr microscope images. Accurate determination of the DW position is critical, so we developed an image processing pipeline using Python libraries like NumPy and OpenCV to achieve pixel-level accuracy. The image processing workflow, illustrated in Supplementary Fig. S5, involves the following steps: 1. Cropping: The region of interest corresponding to the FM wire is cropped from each raw Kerr image. 2. To maximize the contrast between opposite magnetic domains, a binarization algorithm and a median blur filter are applied to the cropped image. This step reduces noise and sharpens the domain boundary. 3. The enhanced image is then converted so that pixels corresponding to each domain polarity are assigned values of +1 or -1. This creates a high-contrast, two-value image where the DW is clearly identifiable.

To visualize the DW's movement over time, the series of processed images is used to generate a kymograph (a space-time heatmap). For each image, the pixel values across the wire's width are averaged for every point along its length. This collapses the 2D image into a 1D line profile. These 1D profiles are then stacked sequentially to form the kymograph. In the resulting heatmap: The *y*-axis represents the position along the wire, and the *x*-axis represents the elapsed time, as an image is captured after each current pulse. The boundary between the +1 and -1 regions on the heatmap tracks the DW's position over time. The DW velocity is then calculated directly from the slope of this boundary.

**Supplementary Note 6. DW pinning field for various *w*FM**

Our study reveals an unexpected enhancement of both SOT efficiency and DW mobility as the ratio *w*FM/*w*HM decreases. While SOT efficiency is generally robust against edge roughness, DW mobility can be highly sensitive to the edge roughness of the FM wire1,2, which creates DW pinning sites. Typically, pinning effects become more pronounced in narrower wires. This is contrary to our observation of the highest mobility in the narrowest FM wires, suggesting that pinning is not the dominant factor.

To directly quantify the influence of pinning, we measured the pinning field (*H*pin​) for two sample series: the conventional control devices CS (2–20, 2–20) and the extended HM devices ES (2–20, 30), as shown in Supplementary Fig. S6 a,c, For each measurement, a reverse domain was first nucleated and then driven by an external magnetic field (*H*z ​) to a consistent starting position. While continuously measuring the anomalous Hall resistance (*R*Hall​), we applied a sweeping Hext​ to expand the domain. The field value at which *R*Hall​ abruptly switches (e.g., from -1 to +1) signifies that the DW has propagated through the Hall cross, and this switching field is defined as *H*pin.

The measured *H*pin for both sample series are plotted as a function of *w*FM in Supplementary Fig. S6b, d. With the minor exception of the narrowest control sample (*w*FM ​=2 µm), the pinning field remains almost constant across all wire widths. Since the pinning field does not vary significantly while the changes by a factor of about 2.5-fold (Fig. 2), we conclude that the observed enhancement in DW velocity is not governed by changes in the DW pinning but is a direct consequence of the enhanced SOT efficiency.

**Supplementary Note 7: Validation of Consistent Magnetic Properties**

A key assumption in our study is that all fabricated HM/FM heterostructures are nominally identical, differing only in their lateral wire widths. This implies that their intrinsic material properties, such as interfacial quality and magnetic anisotropy, should be consistent across all samples. To validate this assumption, we measured the effective perpendicular magnetic anisotropy field (*HK,*eff​) for all sample series using the generalized Sucksmith-Thompson (GST) method.3,4 The extracted *HK,*eff​​ values are plotted for all sample series in Supplementary Fig. S7a-d. The data shows that all *HK,*eff values are consistently clustered around 1 T with minimal scatter, regardless of the device geometry. Furthermore, longitudinal and transverse *HK,*eff is also identical with small errors, it indicates that there is no noticeable induced in-plane anisotropy to the wire direction, it may cause unexpected affects in the interpretation of the experimental data in the harmonic measurements. This result confirms that all our samples possess nearly identical magnetic properties, within a small experimental error. Therefore, we can conclude that our primary findings—the enhancement of SOT efficiency and DW mobility—are intrinsic results of the device geometry and not artifacts of sample-to-sample variations in magnetic anisotropy.

**References**

1. Cayssol, F., Ravelosona, D., Chappert, C., Ferré, J. & Jamet, J. P. Domain Wall Creep in Magnetic Wires. *Physical Review Letters* **92**, 10–13 (2004).

2. Koyama, T. *et al.* Current-induced magnetic domain wall motion below intrinsic threshold triggered by Walker breakdown. *Nature Nanotechnology* **7**, 635–639 (2012).

3. Sucksmith, W. & Thompson, J. E. The magnetic anisotropy of cobalt. **225**, 362–375 (1954).

4. Okamoto, S., Nishiyama, K., Kitakami, O. & Shimada, Y. Enhancement of magnetic surface anisotropy klby the addition of Sm. *Journal of Applied Physics* **90**, 4085–4088 (2001).

Supplementary Fig. S1: Process flow for fabricating samples of *w*HM > *w*FM a, Initial Deposition and Patterning: The full HM/FM heterostructure is deposited on a Si/SiO₂ substrate and patterned into the initial Hall bar geometry of *w*HM. b, FM Mask Definition: A photoresist (PR) mask is patterned via photolithography on top of the HM wire. This mask defines the final, narrower ferromagnetic (FM) region, where *w*FM < *w*HM. c, Controlled Ion Beam Etching: The unprotected top FM layers are removed by ion beam milling. To precisely control the etch depth, a reference sample (consisting of the same FM layers on a transparent glass substrate) is etched simultaneously. The process is terminated once the reference sample becomes visually transparent. d, Post-Etch Structure: After the complete etch, the unwanted FM material has been fully removed, leaving the PR-protected narrower FM wire intact on top of the wider HM layer. e, Final Device: Following the removal (stripping) of the PR, the final device features the desired geometry with a narrow FM wire on a wider HM wire is obtained (*w*HM > *w*FM).

Supplementary Fig. S2 Various cases when the FM layer remained after the etch process: Each panel shows a schematic of the device state (top) and the corresponding AHE measurement (bottom). a, Ideal Etch: In a perfectly etched device, the unwanted ferromagnetic (FM) material outside the desired pattern is completely removed. The AHE measurement yields a single, sharp, square hysteresis loop, which is characteristic of a clean FM wire with strong perpendicular magnetic anisotropy (PMA). b, Incomplete etch with retained PMA: In this case, residual FM patches (highlighted in red) that still possess PMA remain after etching. The AHE loop consequently exhibits a two-step switching behavior. The secondary switching step, indicated by the red arrow, arises from the magnetic switching of these unetched remnants. c, Incomplete etch with lost PMA: Here, the FM remnants have been damaged during the etching process and have lost their PMA. The AHE loop becomes slanted and unsaturated, reflecting a mixed signal from the PMA wire and a linear, in-plane magnetic response from the damaged remnants. The orange arrow highlights this characteristic sloped behavior.

**Supplementary Fig. S3: Determine the current density of HM layer using the parallel resistances model. a**, A diagram of the 4-terminal resistance measurement configuration. The gray and green areas represent the HM and FM layers, respectively. And *w*FM varied from 2 to 20 m with fixed *w*HM of 30 m. **b**, A plot of the total device resistance as a function of the *w*FM, the solid dark squares are the experimentally measured data points. The solid red line is a theoretical fit to the data based on the parallel resistor model described in Eq. (S1).

**Supplementary Fig. S4: SOT efficiency for asymmetric ferromagnet wire position a,b**, A schematic of the device configurations. The FM wire is placed at different asymmetric positions on top of the HM wire. **c**, A plot of the measured DL SOT efficiency as a function of the FM wire's displacement from the HM wire's center. The efficiency is shown to be nearly independent of the wire's position. Inset: The DL effective field as a function of current density for each device. The solid lines are linear fits to the data, and the slope of these lines corresponds to the DL-SOT efficiency.

Supplementary Fig. S5: Image processing method for designating precise DW positions. a, A sequence of raw Kerr microscopy images captured during SOT-driven DW motion. The dark and light gray regions correspond to domains with -*Mz* and +*Mz* magnetization, respectively. The yellow arrow indicates the direction of the applied current pulse. b, The image sequence after applying a binarization filter, which enhances the contrast between the two domain states. c, The binarized images after applying a median blur filter to reduce noise and smooth the domain boundary. d, A space-time heatmap (kymograph) generated from the full sequence of processed images. The red and blue regions represent the -*Mz* and +*Mz* domains. The boundary between them tracks the DW position over time, and its trajectory is highlighted by the white line. And we determine the DW velocity from the slope of the white line.

Supplementary Fig. S6: DW pinning field measurement by using anomalous Hall measurement: a, b, Schematic of the pinning field measurement for CS (2–20,2–20) and ES (2–20, 30) series. An external magnetic field (*H*z>0) expands the +*Mz* domain (light blue) into the -*Mz* domain (dark), driving the DW through the Hall cross. For *H*z<0, the -*Mz* region expands to +*Mz* domain. c, d, Result of *H*pin for various *w*FM in extended *w*HM wire and control samples.

**Supplementary Fig. S7: *H*K,eff for all series of samples.** **a–c**, Results of *H*K,eff as a function of *w*FM in the for CS (2–20, 2–20), ES (2–20, 30) and ES (3, 3–20) series, respectively. **d**, Results of *H*K,eff as a function of the position of the FM wire.
